# Supplementary material
Source: MDPI journal article supplement (https://www.mdpi.com/2076-3417/12/3/1240)
Supplement: s1 [file s1]

Supplementary information

# A Facile Method to Prepare Superhydrophobic Coatings for Various Substrates

Yuxuan Zhang <sup>1</sup>, Shuwen Zhou <sup>1</sup>, Zaosheng Lv <sup>1</sup>, Lixia Fan <sup>2</sup>, Yanfen Huang <sup>1,\*</sup> and Xuegang Liu <sup>3</sup>

<sup>1</sup> Hubei Key Laboratory of Coal Conversion and New Carbon Material, School of Chemistry and Chemical Engineering, Wuhan University of Science and Technology, Wuhan 430081, China; zhangyuxuan619@126.com (Y.Z.); zshuwen15527897458@163.com (S.Z.); lvzaosheng@wust.edu.cn (Z.L.)

<sup>2</sup> School of Materials and Metallurgy, Wuhan University of Science and Technology, Wuhan 430081, China; fanlixia@wust.edu.cn (L.F.)

<sup>3</sup> Jingzhou Conservation Center, Jingzhou 434020, China; liuxuegang705@163.com

\* Correspondence: huangyanfen@wust.edu.cn

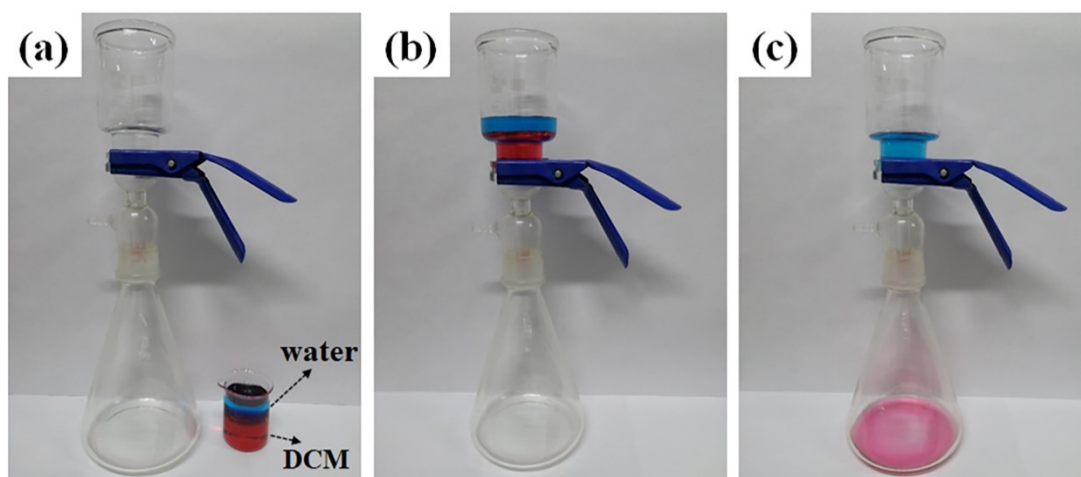

**Figure S1.** The images illustrate oil/water separation of the superhydrophobic coatings. Water droplets were dyed blue by methylene blue. DCM was dyed red by oil red O.

Superhydrophobic porous materials have potential for use in the oil/water separation. Here, oil/water separation test was performed to investigate the potential of the filter paper coated with the superhydrophobic coatings for application in oil/water separation. Fig. S1 shows the separation procedure for a mixture containing DCM and water. The DCM permeated through the coated filter paper under gravity and was collected in the beaker below, whereas the water was retained in the glass tube above the coated filter paper. The results reveal the ability of the coated filter paper to separate oil/water mixtures.
